# Supplementary material for: Obsessive-compulsive Disorder and Depression in University Students: Serial Meditation of (Intrusive and Deliberate) Rumination and Social Anxiety
Source: Research Square preprint supplement (doi:10.21203/rs.3.rs-4606972/v1), 2024-07-17
Supplement: Supplementary file 1 [file 47d4a1ddaf80d2e71bd04f4f.xlsx]

## Sheet: PdC_DATAbase
Edad	Gender	Diagnostic	Intrusive	Deliberate	BDI II	LSAS	TOC	Zintrusive	Zdeliberate	ZBDI II	ZLSAS	ZTOC
25	1	0	17	18	33	78	14	-0.282871	0.158688	1.34257	0.806618	-0.596158
30	2	0	19	24	9	62	49	-0.0055268	1.04648	-0.776368	0.282945	2.06507
22	2	0	2	12	0	32	6	-2.36296	-0.729108	-1.57097	-0.698943	-1.20444
23	2	1	22	13	16	92	21	0.41049	-0.581142	-0.158344	1.26483	-0.0639135
21	2	0	8	9	9	29	23	-1.53092	-1.17301	-0.776368	-0.797132	0.0881565
25	2	2	19	22	42	89	18	-0.0055268	0.750552	2.13717	1.16664	-0.292018
29	2	1	10	20	8	9	7	-1.25358	0.45462	-0.864657	-1.45172	-1.1284
24	1	0	10	17	14	79	17	-1.25358	0.0107222	-0.334923	0.839348	-0.368053
21	2	0	30	19	16	6	19	1.51987	0.306654	-0.158344	-1.54991	-0.215983
18	2	0	16	12	9	44	22	-0.421544	-0.729108	-0.776368	-0.306188	0.0121215
20	1	1	6	16	2	14	14	-1.80827	-0.137244	-1.39439	-1.28808	-0.596158
30	2	0	28	24	53	62	55	1.24252	1.04648	3.10835	0.282945	2.52128
19	2	0	13	14	24	77	27	-0.837561	-0.433176	0.547968	0.773889	0.392297
19	2	0	26	11	22	60	32	0.965179	-0.877074	0.37139	0.217486	0.772471
22	2	0	30	27	14	79	36	1.51987	1.49038	-0.334923	0.839348	1.07661
21	2	0	20	16	24	80	28	0.133146	-0.137244	0.547968	0.872078	0.468332
19	2	0	4	2	12	52	12	-2.08561	-2.20877	-0.511501	-0.044351	-0.748228
20	2	0	18	20	20	59	31	-0.144199	0.45462	0.194812	0.184756	0.696436
21	2	0	25	17	35	111	30	0.826507	0.0107222	1.51915	1.88669	0.620401
23	2	0	14	20	7	25	4	-0.698888	0.45462	-0.952946	-0.92805	-1.35651
25	2	1	18	24	22	30	20	-0.144199	1.04648	0.37139	-0.764402	-0.139948
18	2	2	21	23	43	67	41	0.271818	0.898518	2.22546	0.446593	1.45679
25	2	2	25	24	33	41	34	0.826507	1.04648	1.34257	-0.404376	0.924541
22	1	0	24	15	18	76	18	0.687835	-0.28521	0.0182336	0.741159	-0.292018
18	2	1	27	22	38	55	37	1.10385	0.750552	1.78401	0.0538378	1.15265
21	2	0	28	23	16	73	23	1.24252	0.898518	-0.158344	0.64297	0.0881565
26	2	1	10	13	12	24	12	-1.25358	-0.581142	-0.511501	-0.960779	-0.748228
20	2	1	22	15	29	81	19	0.41049	-0.28521	0.989413	0.904807	-0.215983
20	2	0	29	29	31	65	28	1.3812	1.78631	1.16599	0.381134	0.468332
19	2	0	23	21	13	20	3	0.549163	0.602586	-0.423212	-1.0917	-1.43254
18	2	0	29	21	19	61	27	1.3812	0.602586	0.106523	0.250215	0.392297
19	2	0	13	11	18	14	9	-0.837561	-0.877074	0.0182336	-1.28808	-0.976333
18	2	0	3	2	11	24	13	-2.22428	-2.20877	-0.59979	-0.960779	-0.672193
18	2	0	21	26	27	116	30	0.271818	1.34242	0.812835	2.05034	0.620401
19	2	0	17	18	10	41	12	-0.282871	0.158688	-0.688079	-0.404376	-0.748228
21	2	2	24	19	24	88	38	0.687835	0.306654	0.547968	1.13391	1.22868
18	2	0	10	6	3	27	27	-1.25358	-1.6169	-1.3061	-0.862591	0.392297
19	1	0	9	4	0	3	4	-1.39225	-1.91284	-1.57097	-1.6481	-1.35651
18	2	0	28	18	10	72	43	1.24252	0.158688	-0.688079	0.610241	1.60886
19	1	0	12	15	2	20	10	-0.976233	-0.28521	-1.39439	-1.0917	-0.900298
20	2	0	25	22	26	90	41	0.826507	0.750552	0.724546	1.19937	1.45679
22	2	1	20	20	13	9	30	0.133146	0.45462	-0.423212	-1.45172	0.620401
21	2	2	28	22	32	87	42	1.24252	0.750552	1.25428	1.10118	1.53282
18	2	2	13	16	41	103	26	-0.837561	-0.137244	2.04888	1.62486	0.316262
29	2	1	16	19	5	32	18	-0.421544	0.306654	-1.12952	-0.698943	-0.292018
25	2	1	20	14	18	55	14	0.133146	-0.433176	0.0182336	0.0538378	-0.596158
29	2	1	12	16	25	37	15	-0.976233	-0.137244	0.636257	-0.535295	-0.520123
21	2	0	27	22	17	28	15	1.10385	0.750552	-0.0700554	-0.829861	-0.520123
18	1	0	17	20	16	42	9	-0.282871	0.45462	-0.158344	-0.371647	-0.976333
21	2	0	27	30	27	100	28	1.10385	1.93428	0.812835	1.52667	0.468332
24	2	0	14	17	13	77	37	-0.698888	0.0107222	-0.423212	0.773889	1.15265
20	1	0	15	17	6	7	9	-0.560216	0.0107222	-1.04123	-1.51718	-0.976333
25	2	0	15	20	8	18	8	-0.560216	0.45462	-0.864657	-1.15716	-1.05237
23	1	1	18	16	21	18	19	-0.144199	-0.137244	0.283101	-1.15716	-0.215983
18	2	0	21	20	18	61	31	0.271818	0.45462	0.0182336	0.250215	0.696436
19	2	0	15	13	20	89	18	-0.560216	-0.581142	0.194812	1.16664	-0.292018
24	2	0	13	17	7	54	18	-0.837561	0.0107222	-0.952946	0.0211082	-0.292018
19	2	0	20	18	5	39	5	0.133146	0.158688	-1.12952	-0.469836	-1.28047
18	2	2	21	19	30	61	12	0.271818	0.306654	1.0777	0.250215	-0.748228
18	2	0	22	23	22	70	30	0.41049	0.898518	0.37139	0.544782	0.620401
26	2	1	22	19	11	78	32	0.41049	0.306654	-0.59979	0.806618	0.772471
23	2	1	23	22	23	79	33	0.549163	0.750552	0.459679	0.839348	0.848506
25	1	0	7	15	19	32	10	-1.66959	-0.28521	0.106523	-0.698943	-0.900298
22	1	0	4	13	10	12	6	-2.08561	-0.581142	-0.688079	-1.35353	-1.20444
18	2	2	30	15	45	83	18	1.51987	-0.28521	2.40204	0.970266	-0.292018
19	2	2	28	14	39	88	16	1.24252	-0.433176	1.8723	1.13391	-0.444088
23	2	0	16	4	0	24	22	-0.421544	-1.91284	-1.57097	-0.960779	0.0121215
18	2	0	12	11	13	58	14	-0.976233	-0.877074	-0.423212	0.152027	-0.596158
18	2	0	26	24	17	14	17	0.965179	1.04648	-0.0700554	-1.28808	-0.368053
30	2	2	15	16	9	43	22	-0.560216	-0.137244	-0.776368	-0.338917	0.0121215
19	2	2	26	18	23	46	50	0.965179	0.158688	0.459679	-0.240728	2.1411
22	2	0	15	18	17	75	33	-0.560216	0.158688	-0.0700554	0.70843	0.848506
30	2	0	22	18	15	64	20	0.41049	0.158688	-0.246634	0.348404	-0.139948
30	1	0	11	14	11	44	25	-1.11491	-0.433176	-0.59979	-0.306188	0.240227
18	1	0	1	2	10	77	59	-2.50163	-2.20877	-0.688079	0.773889	2.82542
18	2	0	27	25	20	44	12	1.10385	1.19445	0.194812	-0.306188	-0.748228
18	1	1	9	25	2	10	7	-1.39225	1.19445	-1.39439	-1.41899	-1.1284
22	2	0	6	4	26	24	12	-1.80827	-1.91284	0.724546	-0.960779	-0.748228
18	2	0	18	26	26	15	4	-0.144199	1.34242	0.724546	-1.25535	-1.35651
19	2	2	18	15	34	74	52	-0.144199	-0.28521	1.43086	0.6757	2.29317
25	2	0	8	26	5	34	12	-1.53092	1.34242	-1.12952	-0.633484	-0.748228
21	1	2	23	15	19	12	18	0.549163	-0.28521	0.106523	-1.35353	-0.292018
21	2	2	30	26	40	84	39	1.51987	1.34242	1.96059	1.003	1.30472
21	2	2	26	19	24	93	30	0.965179	0.306654	0.547968	1.29756	0.620401
19	2	0	23	12	27	64	31	0.549163	-0.729108	0.812835	0.348404	0.696436
24	2	0	6	14	0	2	7	-1.80827	-0.433176	-1.57097	-1.68083	-1.1284
21	2	2	18	13	21	73	33	-0.144199	-0.581142	0.283101	0.64297	0.848506
19	2	0	28	30	27	113	41	1.24252	1.93428	0.812835	1.95215	1.45679
19	2	0	19	9	5	51	22	-0.0055268	-1.17301	-1.12952	-0.0770806	0.0121215
19	2	0	23	15	15	51	14	0.549163	-0.28521	-0.246634	-0.0770806	-0.596158
19	2	0	16	4	5	34	7	-0.421544	-1.91284	-1.12952	-0.633484	-1.1284
29	2	2	28	25	34	64	17	1.24252	1.19445	1.43086	0.348404	-0.368053
24	1	2	26	16	43	91	65	0.965179	-0.137244	2.22546	1.2321	3.28163
20	2	1	25	13	43	97	55	0.826507	-0.581142	2.22546	1.42848	2.52128
22	1	0	21	23	12	14	7	0.271818	0.898518	-0.511501	-1.28808	-1.1284
20	2	0	16	20	22	33	6	-0.421544	0.45462	0.37139	-0.666213	-1.20444
21	2	2	20	16	22	41	42	0.133146	-0.137244	0.37139	-0.404376	1.53282
20	2	1	13	27	12	55	24	-0.837561	1.49038	-0.511501	0.0538378	0.164192
21	2	0	10	25	10	18	6	-1.25358	1.19445	-0.688079	-1.15716	-1.20444
21	2	2	27	15	27	111	24	1.10385	-0.28521	0.812835	1.88669	0.164192
22	1	0	28	7	20	108	26	1.24252	-1.46894	0.194812	1.78851	0.316262
25	2	1	25	5	29	74	45	0.826507	-1.76487	0.989413	0.6757	1.76093
19	2	0	25	18	13	68	18	0.826507	0.158688	-0.423212	0.479322	-0.292018
19	1	0	27	27	16	58	22	1.10385	1.49038	-0.158344	0.152027	0.0121215
19	1	0	17	20	24	7	24	-0.282871	0.45462	0.547968	-1.51718	0.164192
19	2	2	28	28	31	104	42	1.24252	1.63835	1.16599	1.65759	1.53282
22	2	0	26	12	3	48	13	0.965179	-0.729108	-1.3061	-0.175269	-0.672193
27	2	1	13	19	11	38	9	-0.837561	0.306654	-0.59979	-0.502565	-0.976333
23	2	0	12	12	21	63	4	-0.976233	-0.729108	0.283101	0.315675	-1.35651
20	2	1	21	16	28	40	22	0.271818	-0.137244	0.901124	-0.437106	0.0121215
19	1	1	19	3	25	40	9	-0.0055268	-2.0608	0.636257	-0.437106	-0.976333
22	2	2	19	7	23	47	10	-0.0055268	-1.46894	0.459679	-0.207999	-0.900298
19	2	0	17	16	1	19	6	-0.282871	-0.137244	-1.48268	-1.12443	-1.20444
19	2	0	21	13	32	86	20	0.271818	-0.581142	1.25428	1.06846	-0.139948
22	1	0	4	18	5	15	1	-2.08561	0.158688	-1.12952	-1.25535	-1.58461
19	2	0	17	23	7	12	17	-0.282871	0.898518	-0.952946	-1.35353	-0.368053
21	2	0	9	20	6	11	7	-1.39225	0.45462	-1.04123	-1.38626	-1.1284
20	2	0	20	21	54	117	61	0.133146	0.602586	3.19664	2.08307	2.97749
20	2	1	24	17	22	66	34	0.687835	0.0107222	0.37139	0.413863	0.924541
19	2	0	24	29	21	59	28	0.687835	1.78631	0.283101	0.184756	0.468332
21	1	0	15	21	5	27	4	-0.560216	0.602586	-1.12952	-0.862591	-1.35651
23	2	2	16	8	43	89	35	-0.421544	-1.32097	2.22546	1.16664	1.00058
19	2	0	26	15	21	60	29	0.965179	-0.28521	0.283101	0.217486	0.544366
21	2	2	23	4	41	112	31	0.549163	-1.91284	2.04888	1.91942	0.696436
19	2	2	26	23	33	58	35	0.965179	0.898518	1.34257	0.152027	1.00058
23	1	2	24	28	17	71	33	0.687835	1.63835	-0.0700554	0.577511	0.848506
21	1	0	7	14	16	21	18	-1.66959	-0.433176	-0.158344	-1.05897	-0.292018
21	2	1	28	20	13	87	57	1.24252	0.45462	-0.423212	1.10118	2.67335
21	2	1	29	12	30	103	12	1.3812	-0.729108	1.0777	1.62486	-0.748228
20	2	0	24	10	26	54	21	0.687835	-1.02504	0.724546	0.0211082	-0.0639135
22	2	0	11	14	18	52	26	-1.11491	-0.433176	0.0182336	-0.044351	0.316262
20	2	0	23	20	19	56	33	0.549163	0.45462	0.106523	0.0865674	0.848506
23	2	1	29	27	10	27	46	1.3812	1.49038	-0.688079	-0.862591	1.83696
21	2	0	17	23	12	77	22	-0.282871	0.898518	-0.511501	0.773889	0.0121215
19	2	2	26	12	32	86	39	0.965179	-0.729108	1.25428	1.06846	1.30472
19	2	0	16	15	27	49	32	-0.421544	-0.28521	0.812835	-0.14254	0.772471
22	2	1	20	13	28	121	18	0.133146	-0.581142	0.901124	2.21399	-0.292018
30	2	1	8	18	9	7	27	-1.53092	0.158688	-0.776368	-1.51718	0.392297
20	2	0	19	21	8	25	17	-0.0055268	0.602586	-0.864657	-0.92805	-0.368053
19	2	0	26	13	35	95	23	0.965179	-0.581142	1.51915	1.36302	0.0881565
20	2	1	13	16	16	42	6	-0.837561	-0.137244	-0.158344	-0.371647	-1.20444
19	2	0	19	21	19	7	13	-0.0055268	0.602586	0.106523	-1.51718	-0.672193
21	1	0	20	24	17	86	25	0.133146	1.04648	-0.0700554	1.06846	0.240227
25	2	2	27	16	24	50	18	1.10385	-0.137244	0.547968	-0.10981	-0.292018
19	2	0	26	27	14	14	10	0.965179	1.49038	-0.334923	-1.28808	-0.900298
19	1	0	9	6	0	4	4	-1.39225	-1.6169	-1.57097	-1.61537	-1.35651
21	1	0	16	14	7	47	20	-0.421544	-0.433176	-0.952946	-0.207999	-0.139948
19	2	0	29	26	15	42	9	1.3812	1.34242	-0.246634	-0.371647	-0.976333
19	1	0	13	16	8	51	18	-0.837561	-0.137244	-0.864657	-0.0770806	-0.292018
22	2	0	10	26	14	28	16	-1.25358	1.34242	-0.334923	-0.829861	-0.444088
26	1	0	10	4	7	17	9	-1.25358	-1.91284	-0.952946	-1.18989	-0.976333
19	2	1	17	22	21	98	13	-0.282871	0.750552	0.283101	1.46121	-0.672193
22	2	1	15	13	28	50	13	-0.560216	-0.581142	0.901124	-0.10981	-0.672193
23	2	2	30	18	35	72	31	1.51987	0.158688	1.51915	0.610241	0.696436
26	1	2	4	10	15	61	16	-2.08561	-1.02504	-0.246634	0.250215	-0.444088
19	2	0	30	7	31	94	32	1.51987	-1.46894	1.16599	1.33029	0.772471
21	2	0	24	14	50	92	37	0.687835	-0.433176	2.84348	1.26483	1.15265
27	2	2	24	19	43	73	32	0.687835	0.306654	2.22546	0.64297	0.772471
18	1	0	30	24	54	117	36	1.51987	1.04648	3.19664	2.08307	1.07661
29	2	0	22	21	1	62	13	0.41049	0.602586	-1.48268	0.282945	-0.672193
20	2	0	20	25	17	47	9	0.133146	1.19445	-0.0700554	-0.207999	-0.976333
19	2	0	18	14	17	79	15	-0.144199	-0.433176	-0.0700554	0.839348	-0.520123
22	2	2	19	11	28	81	34	-0.0055268	-0.877074	0.901124	0.904807	0.924541
18	1	0	26	24	15	102	54	0.965179	1.04648	-0.246634	1.59213	2.44524
20	2	0	7	11	8	41	8	-1.66959	-0.877074	-0.864657	-0.404376	-1.05237
21	1	0	19	12	27	33	14	-0.0055268	-0.729108	0.812835	-0.666213	-0.596158
18	1	0	15	18	6	8	2	-0.560216	0.158688	-1.04123	-1.48445	-1.50858
24	1	0	12	22	9	11	9	-0.976233	0.750552	-0.776368	-1.38626	-0.976333
20	2	0	14	12	11	47	6	-0.698888	-0.729108	-0.59979	-0.207999	-1.20444
18	2	0	6	11	7	4	3	-1.80827	-0.877074	-0.952946	-1.61537	-1.43254
19	2	0	29	19	22	85	18	1.3812	0.306654	0.37139	1.03573	-0.292018
18	2	0	29	1	23	102	19	1.3812	-2.35673	0.459679	1.59213	-0.215983
18	2	0	19	22	32	101	47	-0.0055268	0.750552	1.25428	1.5594	1.913
21	2	0	20	12	31	89	47	0.133146	-0.729108	1.16599	1.16664	1.913
18	2	0	29	24	16	44	57	1.3812	1.04648	-0.158344	-0.306188	2.67335
19	1	0	27	27	11	77	9	1.10385	1.49038	-0.59979	0.773889	-0.976333
18	2	0	30	22	15	17	28	1.51987	0.750552	-0.246634	-1.18989	0.468332
19	2	0	26	17	11	65	38	0.965179	0.0107222	-0.59979	0.381134	1.22868
18	2	2	24	19	37	66	57	0.687835	0.306654	1.69573	0.413863	2.67335
18	2	0	29	18	36	110	40	1.3812	0.158688	1.60744	1.85397	1.38075
24	2	2	20	16	23	118	27	0.133146	-0.137244	0.459679	2.1158	0.392297
18	2	0	27	29	11	26	17	1.10385	1.78631	-0.59979	-0.89532	-0.368053
18	2	0	24	26	29	49	16	0.687835	1.34242	0.989413	-0.14254	-0.444088
18	2	0	17	16	9	32	14	-0.282871	-0.137244	-0.776368	-0.698943	-0.596158
19	1	0	27	30	10	20	13	1.10385	1.93428	-0.688079	-1.0917	-0.672193
18	2	0	1	7	5	6	4	-2.50163	-1.46894	-1.12952	-1.54991	-1.35651
18	1	1	3	2	3	0	0	-2.22428	-2.20877	-1.3061	-1.74629	-1.66065
20	2	0	29	24	22	44	32	1.3812	1.04648	0.37139	-0.306188	0.772471
18	2	0	27	28	20	46	39	1.10385	1.63835	0.194812	-0.240728	1.30472
18	1	0	6	8	4	22	12	-1.80827	-1.32097	-1.21781	-1.02624	-0.748228
18	2	0	9	13	7	74	20	-1.39225	-0.581142	-0.952946	0.6757	-0.139948
18	2	0	14	17	14	68	13	-0.698888	0.0107222	-0.334923	0.479322	-0.672193
18	1	0	16	12	17	87	32	-0.421544	-0.729108	-0.0700554	1.10118	0.772471
18	1	2	28	17	10	102	36	1.24252	0.0107222	-0.688079	1.59213	1.07661
18	2	0	15	28	7	23	12	-0.560216	1.63835	-0.952946	-0.993509	-0.748228
18	2	1	21	29	34	57	19	0.271818	1.78631	1.43086	0.119297	-0.215983
18	2	1	23	19	17	80	20	0.549163	0.306654	-0.0700554	0.872078	-0.139948
18	2	1	18	17	8	30	11	-0.144199	0.0107222	-0.864657	-0.764402	-0.824263
20	2	0	29	25	11	39	28	1.3812	1.19445	-0.59979	-0.469836	0.468332
19	2	2	28	18	36	69	28	1.24252	0.158688	1.60744	0.512052	0.468332
18	2	0	20	14	20	51	29	0.133146	-0.433176	0.194812	-0.0770806	0.544366
18	2	0	18	24	4	32	16	-0.144199	1.04648	-1.21781	-0.698943	-0.444088
18	2	0	16	18	21	50	18	-0.421544	0.158688	0.283101	-0.10981	-0.292018
18	2	0	29	24	14	114	20	1.3812	1.04648	-0.334923	1.98488	-0.139948
18	2	0	15	10	12	72	17	-0.560216	-1.02504	-0.511501	0.610241	-0.368053
21	2	0	22	22	4	22	19	0.41049	0.750552	-1.21781	-1.02624	-0.215983
18	2	2	23	16	12	54	36	0.549163	-0.137244	-0.511501	0.0211082	1.07661
18	2	0	28	19	32	97	26	1.24252	0.306654	1.25428	1.42848	0.316262
18	2	0	8	12	5	42	26	-1.53092	-0.729108	-1.12952	-0.371647	0.316262
18	1	0	21	13	10	90	20	0.271818	-0.581142	-0.688079	1.19937	-0.139948
18	2	2	21	6	18	70	27	0.271818	-1.6169	0.0182336	0.544782	0.392297
18	2	0	8	22	7	64	13	-1.53092	0.750552	-0.952946	0.348404	-0.672193
18	2	1	24	14	20	61	16	0.687835	-0.433176	0.194812	0.250215	-0.444088
19	2	0	15	6	13	67	16	-0.560216	-1.6169	-0.423212	0.446593	-0.444088
18	2	0	20	11	21	53	24	0.133146	-0.877074	0.283101	-0.0116214	0.164192
18	2	0	6	10	7	24	6	-1.80827	-1.02504	-0.952946	-0.960779	-1.20444
18	2	0	18	10	8	19	7	-0.144199	-1.02504	-0.864657	-1.12443	-1.1284
18	2	0	27	22	10	13	12	1.10385	0.750552	-0.688079	-1.3208	-0.748228
18	2	1	19	30	5	46	14	-0.0055268	1.93428	-1.12952	-0.240728	-0.596158
18	2	0	22	17	2	48	9	0.41049	0.0107222	-1.39439	-0.175269	-0.976333
18	2	0	14	8	13	36	10	-0.698888	-1.32097	-0.423212	-0.568024	-0.900298
18	2	0	20	19	13	29	12	0.133146	0.306654	-0.423212	-0.797132	-0.748228
19	1	0	15	19	16	76	12	-0.560216	0.306654	-0.158344	0.741159	-0.748228
19	2	1	30	23	43	129	56	1.51987	0.898518	2.22546	2.47583	2.59731
19	1	1	21	16	25	62	19	0.271818	-0.137244	0.636257	0.282945	-0.215983
18	2	0	27	30	6	44	36	1.10385	1.93428	-1.04123	-0.306188	1.07661
18	2	2	17	5	15	69	11	-0.282871	-1.76487	-0.246634	0.512052	-0.824263
18	2	0	13	17	7	25	14	-0.837561	0.0107222	-0.952946	-0.92805	-0.596158
18	2	0	18	14	9	92	13	-0.144199	-0.433176	-0.776368	1.26483	-0.672193
18	2	0	24	21	16	59	34	0.687835	0.602586	-0.158344	0.184756	0.924541
18	2	0	18	11	11	35	24	-0.144199	-0.877074	-0.59979	-0.600754	0.164192
18	1	0	24	7	17	83	24	0.687835	-1.46894	-0.0700554	0.970266	0.164192
21	2	0	23	2	37	78	42	0.549163	-2.20877	1.69573	0.806618	1.53282
18	2	0	19	13	26	93	32	-0.0055268	-0.581142	0.724546	1.29756	0.772471
19	2	0	16	15	13	74	16	-0.421544	-0.28521	-0.423212	0.6757	-0.444088
18	2	0	16	8	24	89	16	-0.421544	-1.32097	0.547968	1.16664	-0.444088
18	2	0	23	19	7	71	14	0.549163	0.306654	-0.952946	0.577511	-0.596158
18	1	0	20	14	10	54	15	0.133146	-0.433176	-0.688079	0.0211082	-0.520123
19	2	0	25	13	16	20	18	0.826507	-0.581142	-0.158344	-1.0917	-0.292018
18	2	0	19	11	14	34	17	-0.0055268	-0.877074	-0.334923	-0.633484	-0.368053
18	2	2	27	25	27	21	25	1.10385	1.19445	0.812835	-1.05897	0.240227
18	2	0	28	24	31	75	35	1.24252	1.04648	1.16599	0.70843	1.00058
19	2	0	22	25	16	60	34	0.41049	1.19445	-0.158344	0.217486	0.924541
21	1	2	28	28	22	53	32	1.24252	1.63835	0.37139	-0.0116214	0.772471
18	2	0	29	22	11	74	19	1.3812	0.750552	-0.59979	0.6757	-0.215983
19	2	0	18	12	5	12	2	-0.144199	-0.729108	-1.12952	-1.35353	-1.50858
18	2	0	7	21	13	45	8	-1.66959	0.602586	-0.423212	-0.273458	-1.05237
18	2	0	14	8	34	109	29	-0.698888	-1.32097	1.43086	1.82124	0.544366
18	2	0	19	8	24	40	4	-0.0055268	-1.32097	0.547968	-0.437106	-1.35651
20	2	0	13	12	7	52	9	-0.837561	-0.729108	-0.952946	-0.044351	-0.976333
19	1	1	10	20	4	5	11	-1.25358	0.45462	-1.21781	-1.58264	-0.824263
18	2	1	8	10	2	22	5	-1.53092	-1.02504	-1.39439	-1.02624	-1.28047
21	2	0	26	16	16	24	27	0.965179	-0.137244	-0.158344	-0.960779	0.392297
24	2	0	12	23	14	84	36	-0.976233	0.898518	-0.334923	1.003	1.07661
18	2	0	29	22	33	17	28	1.3812	0.750552	1.34257	-1.18989	0.468332
19	2	0	29	26	27	16	30	1.3812	1.34242	0.812835	-1.22262	0.620401
18	2	0	16	13	5	30	11	-0.421544	-0.581142	-1.12952	-0.764402	-0.824263
18	2	0	12	19	3	57	23	-0.976233	0.306654	-1.3061	0.119297	0.0881565
19	2	0	14	15	20	84	25	-0.698888	-0.28521	0.194812	1.003	0.240227
19	2	0	19	16	8	29	8	-0.0055268	-0.137244	-0.864657	-0.797132	-1.05237
19	2	0	19	25	21	39	17	-0.0055268	1.19445	0.283101	-0.469836	-0.368053
18	2	0	19	13	11	56	30	-0.0055268	-0.581142	-0.59979	0.0865674	0.620401
19	2	0	23	23	18	84	30	0.549163	0.898518	0.0182336	1.003	0.620401
18	2	0	19	13	9	25	10	-0.0055268	-0.581142	-0.776368	-0.92805	-0.900298
19	2	0	19	23	9	32	28	-0.0055268	0.898518	-0.776368	-0.698943	0.468332
18	2	0	20	25	7	13	10	0.133146	1.19445	-0.952946	-1.3208	-0.900298
Note
Diagnostic	0=Non diagnostic; 1=physical diagnosis; 2=mental diagnosis
Gende	1=Male; 2=Female
